# Supplementary material
Source: PubMed Central journal article supplement (PMC8989653)

# Electronic Supplementary Appendix

## List of Figures

|                                                                                                                                                                     |    |
|---------------------------------------------------------------------------------------------------------------------------------------------------------------------|----|
| Figure S1. Study design diagram.....                                                                                                                                | 2  |
| Figure S2. [Sensitivity analysis] Trends of standardized differences (SDs) of selected patient characteristics, comparing first-line SGLT-2i versus metformin. .... | 12 |

## List of Tables and Figures

|                                                                                                                                                                                                                         |    |
|-------------------------------------------------------------------------------------------------------------------------------------------------------------------------------------------------------------------------|----|
| Table S1. Baseline patient characteristics .....                                                                                                                                                                        | 3  |
| Table S2. [Clinformatics] Patient characteristics and standardized differences at the time of first-line SGLT-2i or metformin initiation (2013-2019). Values are number (percentage) unless otherwise specified.....    | 4  |
| Table S3. [MarketScan] Patient characteristics and standardized differences at the time of first-line SGLT-2i or metformin initiation (2013-2018). Values are number (percentage) unless otherwise specified.....       | 6  |
| Table S4. [Medicare] Patient characteristics and standardized differences at the time of first-line SGLT-2i and metformin initiation (2013-2018). Values are number (percentage) unless otherwise specified.....        | 8  |
| Table S5. [Sensitivity analysis] Patient characteristics and standardized differences at the time of first-line SGLT-2i and metformin initiation (2013-2019). Values are percentage (%) unless otherwise specified..... | 10 |

### Author Name(s) and Affiliation:

HoJin Shin, B.Pharm, PhD<sup>1</sup>, Sebastian Schneeweiss, MD, ScD<sup>1,2</sup>, Robert J. Glynn, ScD, PhD<sup>1</sup>, Elisabetta Patorno, MD, DrPH<sup>1</sup>

1. Division of Pharmacoepidemiology and Pharmacoeconomics, Department of Medicine, Brigham and Women's Hospital and Harvard Medical School, Boston, MA

2. Department of Epidemiology, Harvard T.H. Chan School of Public Health, Boston, MA

Figure S1. Study design diagram

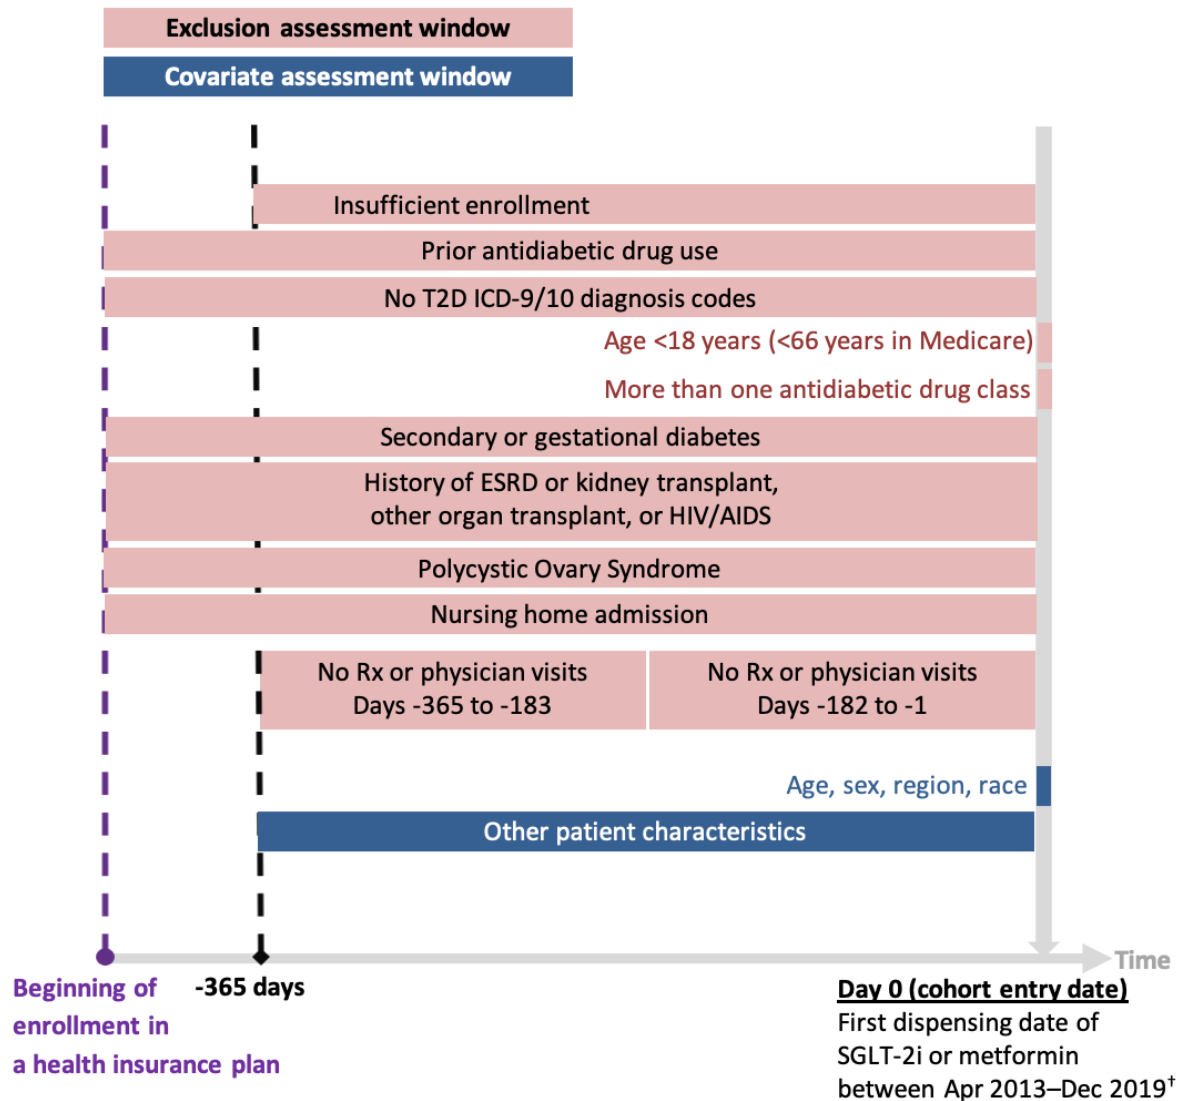

T2D: type 2 diabetes; ESRD: end-stage renal disease; HIV/AIDS: human immunodeficiency virus/acquired immune deficiency syndrome; Rx: prescription.

<sup>†</sup> Data range: Clinformatics (Apr 2013–Dec 2019) / MarketScan and Medicare (Apr 2013–Dec 2018)

**Table S1. Baseline patient characteristics**

| Category of patient characteristics                                                                                                            | Variable(s)                                                                                                                                                                                                                                                                                                                         |
|------------------------------------------------------------------------------------------------------------------------------------------------|-------------------------------------------------------------------------------------------------------------------------------------------------------------------------------------------------------------------------------------------------------------------------------------------------------------------------------------|
| Demographics                                                                                                                                   | Age, sex, geographic region*, Medicare Advantage**, race***                                                                                                                                                                                                                                                                         |
| Lifestyle risk factors                                                                                                                         | Obesity or overweight, smoking                                                                                                                                                                                                                                                                                                      |
| Claims-measured proxies of diabetes severity and duration                                                                                      | Diabetic nephropathy, diabetic neuropathy, diabetic retinopathy                                                                                                                                                                                                                                                                     |
| Risk factors for prognosis of diabetes                                                                                                         | CVD†, CKD                                                                                                                                                                                                                                                                                                                           |
| Other comorbidities                                                                                                                            | Hyperlipidemia, hypertension, COPD, malignant neoplasm                                                                                                                                                                                                                                                                              |
| Physician specialties††                                                                                                                        | Cardiologist visits, endocrinologist visits, internist visits, nurse practitioner or physician assistant visits                                                                                                                                                                                                                     |
| Healthcare utilization as proxy for overall health status and care intensity, and claims-measured proxies of socioeconomic status <sup>1</sup> | Any recent hospitalizations <sup>#</sup> , average days of hospitalizations, number of ED visits, number of office visits, number of HbA1c test orders, ratio of the number of brand name versus generic drug use <sup>##</sup> , number of unique medications, copay for pharmacy cost, preventive healthcare service <sup>§</sup> |
| Concomitant medications                                                                                                                        | ACE inhibitors or ARBs<br>Antithrombotic medications<br>Beta blockers<br>Calcium channel blockers<br>Loop diuretics<br>Statin<br>Thiazides                                                                                                                                                                                          |
| Laboratory results**                                                                                                                           | HbA1c (%) <sup>§§</sup> , eGFR (mL/min/1.73m <sup>2</sup> ) <sup>¶</sup> , LDL (mg/dl), HDL (mg/dl), total cholesterol (mg/dl), triglyceride (mg/dl)                                                                                                                                                                                |

CVD: cardiovascular disease; CKD: chronic kidney disease; COPD: chronic obstructive pulmonary disease; ED: emergency department; HbA1c: hemoglobin A1c; ACE inhibitors: Angiotensin-converting enzyme inhibitors; ARBs: Angiotensin II receptor blockers.

\* Northeast (CT, MA, ME, NH, NJ, NY, PA, RI, VT)

South (AL, AR, DC, DE, FL, GA, KY, LA, MD, MS, NC, OK, SC, TN, TX, VA, WV)

Midwest (IA, IL, IN, KS, MI, MN, MO, ND, NE, OH, SD, WI)

West (AK, AZ, CA, CO, HI, ID, MT, NM, NV, OR, UT, WA, WY)

\*\* Available for Clinformatics and MarketScan databases.

\*\*\* Available for Clinformatics and Medicare databases.

† Defined as history of myocardial infarction, stable or unstable angina, other ischemic heart disease, transient ischemic attack, stroke, atherosclerotic peripheral vascular disease, or heart failure.

†† Defined as specialist visits occurred within 7 days prior to cohort entry.

# Defined as any hospitalizations occurred within 30 days prior to cohort entry.

## Added 1 to both numerator and denominator, then log-transformed.

§ Defined as administration of bone mineral density test, colonoscopy, fecal occult blood test, mammography, pap smear, prostate-specific antigen (PSA) test, flu vaccine, or pneumococcal vaccine.

§§ Measured 180 days prior to or on cohort entry.

¶ Estimated using the quadratic GFR equation:  $GFR = \exp(1.911 + \frac{5.249}{\text{Serum creatinine}} - \frac{2.114}{\text{Serum creatinine}^2} - 0.00686 * \text{Age} - 0.205 \text{ (if female)})$ . If serum creatinine <0.8 mg/dL, use 0.8 for serum creatinine.

<sup>1</sup> Gopalakrishnan, C. et al. Evaluation of Socioeconomic Status Indicators for Confounding Adjustment in Observational Studies of Medication Use. Clin. Pharmacol. Ther. 105, 1513–1521 (2019).

**Table S2. [Clinformatics] Patient characteristics and standardized differences at the time of first-line SGLT-2i or metformin initiation (2013-2019). Values are number (percentage) unless otherwise specified.**

| Baseline characteristics                          | Apr2013-Dec2014    |                         |       | Jan2015-Jun2016    |                         |       | Jul2016-Dec2017    |                         |       | Jan2018-Dec2019      |                         |       |
|---------------------------------------------------|--------------------|-------------------------|-------|--------------------|-------------------------|-------|--------------------|-------------------------|-------|----------------------|-------------------------|-------|
|                                                   | SGLT-2i<br>(n=329) | Metformin<br>(n=48,790) | SD    | SGLT-2i<br>(n=488) | Metformin<br>(n=46,792) | SD    | SGLT-2i<br>(n=714) | Metformin<br>(n=49,318) | SD    | SGLT-2i<br>(n=1,054) | Metformin<br>(n=68,287) | SD    |
| <b>Demographics</b>                               |                    |                         |       |                    |                         |       |                    |                         |       |                      |                         |       |
| Age (mean, std.dev)                               | 54.20 (10.24)      | 59.72 (12.49)           | -0.48 | 57.32 (11.50)      | 60.43 (12.66)           | -0.26 | 58.84 (11.12)      | 60.45 (12.59)           | -0.14 | 61.31 (12.36)        | 61.31 (12.60)           | 0.00  |
| Gender (Male)                                     | 149 (45.3)         | 25264 (51.8)            | -0.13 | 268 (54.9)         | 24264 (51.9)            | 0.06  | 353 (49.4)         | 25701 (52.1)            | -0.05 | 602 (57.1)           | 36623 (53.6)            | 0.07  |
| Region*                                           |                    |                         |       |                    |                         |       |                    |                         |       |                      |                         |       |
| Northeast                                         | 30 (9.1)           | 5382 (11.0)             | -0.06 | 48 (9.8)           | 5843 (12.5)             | -0.08 | 71 (9.9)           | 5110 (10.4)             | -0.01 | 115 (10.9)           | 7373 (10.8)             | 0.00  |
| South                                             | 186 (56.5)         | 22401 (45.9)            | 0.21  | 270 (55.3)         | 20433 (43.7)            | 0.23  | 386 (54.1)         | 23483 (47.6)            | 0.13  | 558 (52.9)           | 32653 (47.8)            | 0.10  |
| Midwest                                           | 70 (21.3)          | 10480 (21.5)            | 0.00  | 98 (20.1)          | 9529 (20.4)             | -0.01 | 162 (22.7)         | 10554 (21.4)            | 0.03  | 217 (20.6)           | 14231 (20.8)            | -0.01 |
| West                                              | 43 (13.1)          | 10527 (21.6)            | -0.23 | 72 (14.8)          | 10987 (23.5)            | -0.22 | 95 (13.3)          | 10171 (20.6)            | -0.20 | 164 (15.6)           | 14030 (20.5)            | -0.13 |
| Medicare Advantage                                | 34 (10.3)          | 19464 (39.9)            | -0.73 | 143 (29.3)         | 21070 (45.0)            | -0.33 | 234 (32.8)         | 22379 (45.4)            | -0.26 | 516 (49.0)           | 34359 (50.3)            | -0.03 |
| Race (White)                                      | 244 (74.2)         | 31142 (63.8)            | 0.22  | 298 (61.1)         | 27498 (58.8)            | 0.05  | 452 (63.3)         | 29104 (59.0)            | 0.09  | 574 (54.5)           | 36738 (53.8)            | 0.01  |
| <b>Life-style risk factors</b>                    |                    |                         |       |                    |                         |       |                    |                         |       |                      |                         |       |
| Obesity or Overweight                             | 114 (34.7)         | 13696 (28.1)            | 0.14  | 181 (37.1)         | 16002 (34.2)            | 0.06  | 350 (49.0)         | 21193 (43.0)            | 0.12  | 541 (51.3)           | 34634 (50.7)            | 0.01  |
| Smoking                                           | 25 (7.6)           | 6022 (12.3)             | -0.16 | 52 (10.7)          | 6663 (14.2)             | -0.11 | 134 (18.8)         | 9276 (18.8)             | 0.00  | 248 (23.5)           | 14629 (21.4)            | 0.05  |
| <b>Comorbidities</b>                              |                    |                         |       |                    |                         |       |                    |                         |       |                      |                         |       |
| Diabetic Nephropathy                              | 10 (3.0)           | 1460 (3.0)              | 0.00  | 25 (5.1)           | 2346 (5.0)              | 0.00  | 57 (8.0)           | 2374 (4.8)              | 0.13  | 115 (10.9)           | 3933 (5.8)              | 0.19  |
| Diabetic Neuropathy                               | 29 (8.8)           | 2170 (4.4)              | 0.18  | 40 (8.2)           | 3101 (6.6)              | 0.06  | 68 (9.5)           | 2998 (6.1)              | 0.13  | 117 (11.1)           | 4344 (6.4)              | 0.17  |
| Diabetic Retinopathy                              | 4 (1.2)            | 518 (1.1)               | 0.01  | 7 (1.4)            | 588 (1.3)               | 0.02  | 10 (1.4)           | 509 (1.0)               | 0.03  | 36 (3.4)             | 926 (1.4)               | 0.14  |
| CVD**                                             | 45 (13.7)          | 10368 (21.3)            | -0.20 | 95 (19.5)          | 10049 (21.5)            | -0.05 | 172 (24.1)         | 10573 (21.4)            | 0.06  | 380 (36.1)           | 16071 (23.5)            | 0.28  |
| Hyperlipidemia                                    | 245 (74.5)         | 35008 (71.8)            | 0.06  | 364 (74.6)         | 32017 (68.4)            | 0.14  | 510 (71.4)         | 32453 (65.8)            | 0.12  | 764 (72.5)           | 47117 (69.0)            | 0.08  |
| Hypertension                                      | 227 (69.0)         | 33168 (68.0)            | 0.02  | 349 (71.5)         | 31615 (67.6)            | 0.09  | 513 (71.8)         | 33242 (67.4)            | 0.10  | 809 (76.8)           | 47121 (69.0)            | 0.18  |
| CKD                                               | 11 (3.3)           | 2571 (5.3)              | -0.09 | 25 (5.1)           | 3342 (7.1)              | -0.08 | 57 (8.0)           | 3362 (6.8)              | 0.04  | 126 (12.0)           | 5274 (7.7)              | 0.14  |
| COPD                                              | 18 (5.5)           | 4018 (8.2)              | -0.11 | 27 (5.5)           | 3897 (8.3)              | -0.11 | 69 (9.7)           | 4293 (8.7)              | 0.03  | 119 (11.3)           | 6736 (9.9)              | 0.05  |
| History of Malignant Neoplasm                     | 15 (4.6)           | 3570 (7.3)              | -0.12 | 38 (7.8)           | 3402 (7.3)              | 0.02  | 49 (6.9)           | 3569 (7.2)              | -0.01 | 91 (8.6)             | 5191 (7.6)              | 0.04  |
| <b>Physician specialties†</b>                     |                    |                         |       |                    |                         |       |                    |                         |       |                      |                         |       |
| Cardiologists                                     | 7 (2.1)            | 2152 (4.4)              | -0.13 | 16 (3.3)           | 2045 (4.4)              | -0.06 | 17 (2.4)           | 2477 (5.0)              | -0.14 | 68 (6.5)             | 3579 (5.2)              | 0.05  |
| Endocrinologists                                  | 15 (4.6)           | 1046 (2.1)              | 0.13  | 9 (1.8)            | 988 (2.1)               | -0.02 | 19 (2.7)           | 960 (1.9)               | 0.05  | 41 (3.9)             | 1349 (2.0)              | 0.11  |
| Internists                                        | 136 (41.3)         | 33260 (68.2)            | -0.56 | 204 (41.8)         | 31874 (68.1)            | -0.55 | 292 (40.9)         | 34507 (70.0)            | -0.61 | 480 (45.5)           | 48214 (70.6)            | -0.53 |
| Nurse practitioners or physician assistants       | 8 (2.4)            | 980 (2.0)               | 0.03  | 2 (0.4)            | 1303 (2.8)              | -0.19 | 11 (1.5)           | 1796 (3.6)              | -0.13 | 22 (2.1)             | 3529 (5.2)              | -0.17 |
| <b>Healthcare utilization</b>                     |                    |                         |       |                    |                         |       |                    |                         |       |                      |                         |       |
| Any recent hospitalization††                      | 2 (0.6)            | 1599 (3.3)              | -0.19 | 6 (1.2)            | 1421 (3.0)              | -0.13 | 5 (0.7)            | 1628 (3.3)              | -0.19 | 33 (3.1)             | 2497 (3.7)              | -0.03 |
| Average length of hospitalization (mean, std.dev) | 0.28 (2.23)        | 0.51 (2.51)             | -0.10 | 0.35 (2.08)        | 0.42 (2.09)             | -0.03 | 0.30 (1.34)        | 0.48 (2.87)             | -0.08 | 0.45 (1.58)          | 0.50 (2.45)             | -0.02 |
| Number of ED visits (mean, Std.dev)               | 0.82 (2.38)        | 0.89 (2.42)             | -0.03 | 0.94 (2.56)        | 0.86 (2.30)             | 0.03  | 0.93 (2.55)        | 0.92 (2.43)             | 0.00  | 0.92 (2.32)          | 0.91 (2.41)             | 0.00  |
| Number of office visits (mean, std.dev)           | 9.46 (8.07)        | 9.73 (9.50)             | -0.03 | 10.32 (8.70)       | 9.22 (8.87)             | 0.12  | 10.80 (10.02)      | 9.27 (9.25)             | 0.16  | 11.55 (9.92)         | 9.69 (9.43)             | 0.19  |
| Number of HbA1c tests ordered (mean, std.dev)     | 1.80 (1.14)        | 1.53 (1.05)             | 0.25  | 1.87 (1.12)        | 1.55 (1.05)             | 0.30  | 1.86 (1.18)        | 1.55 (1.02)             | 0.28  | 1.93 (1.16)          | 1.59 (1.04)             | 0.31  |
| Brand/Generic ratio# (mean, std.dev)              | -1.34 (1.24)       | -1.64 (1.24)            | 0.24  | -1.49 (1.21)       | -1.75 (1.22)            | 0.21  | -1.67 (1.23)       | -1.90 (1.20)            | 0.19  | -1.80 (1.21)         | -1.99 (1.15)            | 0.16  |
| Number of unique medications (mean, std.dev)      | 8.52 (6.62)        | 9.54 (7.35)             | -0.15 | 8.96 (7.25)        | 9.11 (7.42)             | -0.02 | 9.32 (8.09)        | 9.37 (7.48)             | -0.01 | 11.19 (9.38)         | 9.99 (7.85)             | 0.14  |
| Copay for pharmacy cost (\$, mean, std.dev)       | 331.39<br>(405.73) | 385.78<br>(576.46)      | -0.11 | 373.93<br>(616.64) | 342.40<br>(610.83)      | 0.05  | 378.07<br>(796.77) | 306.81<br>(592.10)      | 0.10  | 375.74<br>(611.63)   | 295.25<br>(556.32)      | 0.14  |
| Preventive healthcare service###                  | 223 (67.8)         | 35038 (71.8)            | -0.09 | 342 (70.1)         | 33650 (71.9)            | -0.04 | 519 (72.7)         | 35746 (72.5)            | 0.00  | 799 (75.8)           | 50306 (73.7)            | 0.05  |
| <b>Concomitant medications</b>                    |                    |                         |       |                    |                         |       |                    |                         |       |                      |                         |       |
| ACE inhibitors or ARBs                            | 138 (41.9)         | 26909 (55.2)            | -0.27 | 236 (48.4)         | 25980 (55.5)            | -0.14 | 349 (48.9)         | 27503 (55.8)            | -0.14 | 557 (52.8)           | 38788 (56.8)            | -0.08 |
| Antithrombotic medications                        | 26 (7.9)           | 5268 (10.8)             | -0.10 | 50 (10.2)          | 5067 (10.8)             | -0.02 | 70 (9.8)           | 5658 (11.5)             | -0.05 | 234 (22.2)           | 8835 (12.9)             | 0.25  |
| Beta blockers                                     | 60 (18.2)          | 14079 (28.9)            | -0.25 | 120 (24.6)         | 13074 (27.9)            | -0.08 | 173 (24.2)         | 13764 (27.9)            | -0.08 | 353 (33.5)           | 20333 (29.8)            | 0.08  |
| Calcium channel blockers                          | 48 (14.6)          | 10829 (22.2)            | -0.20 | 100 (20.5)         | 10405 (22.2)            | -0.04 | 131 (18.3)         | 11311 (22.9)            | -0.11 | 256 (24.3)           | 16716 (24.5)            | 0.00  |
| Loop diuretics                                    | 18 (5.5)           | 3588 (7.4)              | -0.08 | 23 (4.7)           | 3291 (7.0)              | -0.10 | 59 (8.3)           | 3622 (7.3)              | 0.03  | 131 (12.4)           | 5382 (7.9)              | 0.15  |
| Statin                                            | 128 (38.9)         | 25977 (53.2)            | -0.29 | 211 (43.2)         | 24830 (53.1)            | -0.20 | 332 (46.5)         | 26767 (54.3)            | -0.16 | 559 (53.0)           | 38904 (57.0)            | -0.08 |
| Thiazides                                         | 30 (9.1)           | 6312 (12.9)             | -0.12 | 55 (11.3)          | 5882 (12.6)             | -0.04 | 69 (9.7)           | 6568 (13.3)             | -0.11 | 111 (10.5)           | 9632 (14.1)             | -0.11 |
| <b>Laboratory values</b>                          |                    |                         |       |                    |                         |       |                    |                         |       |                      |                         |       |

|                                                               |                    |                    |       |                    |                    |       |                    |                    |       |                    |                    |       |
|---------------------------------------------------------------|--------------------|--------------------|-------|--------------------|--------------------|-------|--------------------|--------------------|-------|--------------------|--------------------|-------|
| HbA1c <sup>§</sup> (%; mean, std.dev)                         | 8.04 (2.03)        | 7.27 (1.49)        | 0.43  | 7.84 (1.77)        | 7.29 (1.53)        | 0.33  | 7.62 (1.68)        | 7.32 (1.55)        | 0.19  | 7.56 (1.61)        | 7.33 (1.59)        | 0.15  |
| Missing                                                       | 189 (57.4)         | 29783 (61.0)       | -0.07 | 242 (49.6)         | 25605 (54.7)       | -0.10 | 367 (51.4)         | 25445 (51.6)       | 0.00  | 566 (53.7)         | 36874 (54.0)       | -0.01 |
| eGFR <sup>¶</sup> (mL/min/1.73m <sup>2</sup> ; mean, std.dev) | 101.76 (16.66)     | 97.75 (17.03)      | 0.24  | 99.06 (18.56)      | 96.74 (17.23)      | 0.13  | 96.48 (18.27)      | 96.77 (17.32)      | -0.02 | 93.60 (20.02)      | 95.61 (17.49)      | -0.11 |
| Missing                                                       | 177 (53.8)         | 27174 (55.7)       | -0.04 | 227 (46.5)         | 24164 (51.6)       | -0.10 | 351 (49.2)         | 24182 (49.0)       | 0.00  | 536 (50.9)         | 35711 (52.3)       | -0.03 |
| LDL (mg/dl; mean, std.dev)                                    | 101.15 (38.65)     | 100.44 (40.50)     | 0.02  | 93.93 (37.19)      | 98.74 (40.76)      | -0.12 | 96.22 (41.95)      | 99.79 (40.19)      | -0.09 | 89.43 (40.80)      | 98.66 (40.62)      | -0.23 |
| Missing                                                       | 190 (57.8)         | 29551 (60.6)       | -0.06 | 258 (52.9)         | 26146 (55.9)       | -0.06 | 383 (53.6)         | 26573 (53.9)       | 0.00  | 603 (57.2)         | 39311 (57.6)       | -0.01 |
| HDL (mg/dl; mean, std.dev)                                    | 46.61 (12.98)      | 46.96 (13.82)      | -0.03 | 45.79 (13.90)      | 46.85 (14.28)      | -0.07 | 46.93 (14.06)      | 46.92 (14.04)      | 0.00  | 46.46 (14.20)      | 46.15 (13.21)      | 0.02  |
| Missing                                                       | 189 (57.4)         | 29680 (60.8)       | -0.07 | 260 (53.3)         | 26894 (57.5)       | -0.08 | 390 (54.6)         | 27505 (55.8)       | -0.02 | 613 (58.2)         | 40390 (59.1)       | -0.02 |
| Total cholesterol (mg/dl; mean, std.dev)                      | 188.23 (45.86)     | 186.99 (44.28)     | 0.03  | 179.88 (48.51)     | 185.66 (45.72)     | -0.12 | 182.52 (44.09)     | 185.99 (44.77)     | -0.08 | 175.47 (43.06)     | 182.90 (45.37)     | -0.17 |
| Missing                                                       | 187 (56.8)         | 29466 (60.4)       | -0.07 | 257 (52.7)         | 26530 (56.7)       | -0.08 | 385 (53.9)         | 26964 (54.7)       | -0.02 | 606 (57.5)         | 39694 (58.1)       | -0.01 |
| Triglyceride (mg/dl; mean, std.dev)                           | 184.85<br>(136.23) | 182.08<br>(158.01) | 0.02  | 201.83<br>(313.61) | 182.58<br>(155.25) | 0.08  | 183.52<br>(128.82) | 183.97<br>(166.15) | 0.00  | 189.48<br>(183.04) | 182.21<br>(158.54) | 0.04  |
| Missing                                                       | 188 (57.1)         | 29586 (60.6)       | -0.07 | 259 (53.1)         | 26814 (57.3)       | -0.09 | 385 (53.9)         | 27206 (55.2)       | -0.02 | 607 (57.6)         | 39866 (58.4)       | -0.02 |

SD: standardized difference; std.dev: standard deviation; HbA1c: hemoglobin A1c; CVD: cardiovascular disease; CKD: chronic kidney disease; COPD: chronic obstructive pulmonary disease; ED: emergency department.

\* Northeast (CT, MA, ME, NH, NJ, NY, PA, RI, VT)

South (AL, AR, DC, DE, FL, GA, KY, LA, MD, MS, NC, OK, SC, TN, TX, VA, WV)

Midwest (IA, IL, IN, KS, MI, MN, MO, ND, NE, OH, SD, WI)

West (AK, AZ, CA, CO, HI, ID, MT, NM, NV, OR, UT, WA, WY)

\*\* Defined as a history of myocardial infarction, stable or unstable angina, other ischemic heart diseases, transient ischemic attack, stroke, atherosclerotic peripheral vascular disease, or heart failure.

† Defined as specialist visits occurred within 7 days prior to cohort entry.

†† Defined as hospitalization occurred within 30 days prior to cohort entry.

# Added 1 to both numerator and denominator, then log-transformed.

### Defined as administration of bone mineral density (BMD) test, colonoscopy, fecal occult blood test, mammography, pap smear, prostate-specific antigen (PSA) test, flu vaccine, or pneumococcal vaccine.

§ Measured 180 days prior to or on cohort entry.

¶ Estimated using the quadratic GFR equation:  $GFR = \exp(1.911 + \frac{5.249}{\text{Serum creatinine}} - \frac{2.114}{\text{Serum creatinine}^2} - 0.00686 * \text{Age} - 0.205 \text{ (if female)})$ . If serum creatinine <0.8 mg/dL, use 0.8 for serum creatinine.

**Table S3. [MarketScan] Patient characteristics and standardized differences at the time of first-line SGLT-2i or metformin initiation (2013-2018). Values are number (percentage) unless otherwise specified.**

| Baseline characteristics                          | Apr2013-Dec2014      |                          |       | Jan2015-Jun2016      |                         |       | Jul2016-Dec2017      |                         |       | Jan2018-Dec2018    |                         |       |
|---------------------------------------------------|----------------------|--------------------------|-------|----------------------|-------------------------|-------|----------------------|-------------------------|-------|--------------------|-------------------------|-------|
|                                                   | SGLT-2i<br>(n=1,187) | Metformin<br>(n=102,754) | SD    | SGLT-2i<br>(n=1,434) | Metformin<br>(n=79,538) | SD    | SGLT-2i<br>(n=1,007) | Metformin<br>(n=66,111) | SD    | SGLT-2i<br>(n=524) | Metformin<br>(n=35,097) | SD    |
| <b>Demographics</b>                               |                      |                          |       |                      |                         |       |                      |                         |       |                    |                         |       |
| Age (mean, std.dev)                               | 54.14 (9.54)         | 55.90 (11.24)            | -0.17 | 53.54 (9.51)         | 55.21 (11.00)           | -0.16 | 54.44 (9.85)         | 54.96 (10.90)           | -0.05 | 53.47 (10.01)      | 53.57 (10.38)           | -0.01 |
| Gender (Male)                                     | 587 (49.5)           | 52968 (51.5)             | -0.04 | 718 (50.1)           | 40833 (51.3)            | -0.03 | 507 (50.3)           | 34477 (52.2)            | -0.04 | 298 (56.9)         | 18873 (53.8)            | 0.06  |
| Region*                                           |                      |                          |       |                      |                         |       |                      |                         |       |                    |                         |       |
| Northeast                                         | 226 (19.0)           | 18623 (18.1)             | 0.02  | 277 (19.3)           | 14173 (17.8)            | 0.04  | 178 (17.7)           | 11088 (16.8)            | 0.02  | 128 (24.4)         | 6181 (17.6)             | 0.17  |
| South                                             | 651 (54.8)           | 41888 (40.8)             | 0.28  | 832 (58.0)           | 38188 (48.0)            | 0.20  | 619 (61.5)           | 33574 (50.8)            | 0.22  | 276 (52.7)         | 16710 (47.6)            | 0.10  |
| Midwest                                           | 188 (15.8)           | 24342 (23.7)             | -0.20 | 201 (14.0)           | 16673 (21.0)            | -0.18 | 117 (11.6)           | 13035 (19.7)            | -0.22 | 79 (15.1)          | 7434 (21.2)             | -0.16 |
| West                                              | 122 (10.3)           | 17901 (17.4)             | -0.21 | 124 (8.6)            | 10504 (13.2)            | -0.15 | 93 (9.2)             | 8414 (12.7)             | -0.11 | 41 (7.8)           | 4772 (13.6)             | -0.19 |
| Medicare Advantage                                | 117 (9.9)            | 19049 (18.5)             | -0.25 | 121 (8.4)            | 12178 (15.3)            | -0.21 | 103 (10.2)           | 8904 (13.5)             | -0.10 | 43 (8.2)           | 2994 (8.5)              | -0.01 |
| Race (White)                                      | NA                   | NA                       | NA    | NA                   | NA                      | NA    | NA                   | NA                      | NA    | NA                 | NA                      | NA    |
| <b>Life-style risk factors</b>                    |                      |                          |       |                      |                         |       |                      |                         |       |                    |                         |       |
| Obesity or Overweight                             | 308 (25.9)           | 22009 (21.4)             | 0.11  | 487 (34.0)           | 25630 (32.2)            | 0.04  | 412 (40.9)           | 26923 (40.7)            | 0.00  | 238 (45.4)         | 16039 (45.7)            | -0.01 |
| Smoking                                           | 66 (5.6)             | 7774 (7.6)               | -0.08 | 116 (8.1)            | 7773 (9.8)              | -0.06 | 83 (8.2)             | 7417 (11.2)             | -0.10 | 55 (10.5)          | 4161 (11.9)             | -0.04 |
| <b>Comorbidities</b>                              |                      |                          |       |                      |                         |       |                      |                         |       |                    |                         |       |
| Diabetic Nephropathy                              | 19 (1.6)             | 1065 (1.0)               | 0.05  | 27 (1.9)             | 1117 (1.4)              | 0.04  | 26 (2.6)             | 1328 (2.0)              | 0.04  | 16 (3.1)           | 793 (2.3)               | 0.05  |
| Diabetic Neuropathy                               | 54 (4.5)             | 2547 (2.5)               | 0.11  | 80 (5.6)             | 2063 (2.6)              | 0.15  | 52 (5.2)             | 1909 (2.9)              | 0.12  | 28 (5.3)           | 1016 (2.9)              | 0.12  |
| Diabetic Retinopathy                              | 20 (1.7)             | 714 (0.7)                | 0.09  | 24 (1.7)             | 471 (0.6)               | 0.10  | 3 (0.3)              | 231 (0.3)               | -0.01 | 10 (1.9)           | 226 (0.6)               | 0.11  |
| CVD**                                             | 177 (14.9)           | 16211 (15.8)             | -0.02 | 218 (15.2)           | 12107 (15.2)            | 0.00  | 176 (17.5)           | 9645 (14.6)             | 0.08  | 102 (19.5)         | 4572 (13.0)             | 0.18  |
| Hyperlipidemia                                    | 807 (68.0)           | 62520 (60.8)             | 0.15  | 958 (66.8)           | 48955 (61.5)            | 0.11  | 573 (56.9)           | 35751 (54.1)            | 0.06  | 337 (64.3)         | 20402 (58.1)            | 0.13  |
| Hypertension                                      | 732 (61.7)           | 59591 (58.0)             | 0.08  | 939 (65.5)           | 48935 (61.5)            | 0.08  | 647 (64.3)           | 40875 (61.8)            | 0.05  | 339 (64.7)         | 20988 (59.8)            | 0.10  |
| CKD                                               | 24 (2.0)             | 1989 (1.9)               | 0.01  | 43 (3.0)             | 1800 (2.3)              | 0.05  | 26 (2.6)             | 1701 (2.6)              | 0.00  | 12 (2.3)           | 796 (2.3)               | 0.00  |
| COPD                                              | 52 (4.4)             | 5012 (4.9)               | -0.02 | 59 (4.1)             | 3946 (5.0)              | -0.04 | 45 (4.5)             | 3060 (4.6)              | -0.01 | 18 (3.4)           | 1371 (3.9)              | -0.03 |
| History of Malignant Neoplasm                     | 55 (4.6)             | 6288 (6.1)               | -0.07 | 62 (4.3)             | 4781 (6.0)              | -0.08 | 55 (5.5)             | 3931 (5.9)              | -0.02 | 29 (5.5)           | 1906 (5.4)              | 0.00  |
| <b>Physician specialties†</b>                     |                      |                          |       |                      |                         |       |                      |                         |       |                    |                         |       |
| Cardiologists                                     | 21 (1.8)             | 3029 (2.9)               | -0.08 | 29 (2.0)             | 2529 (3.2)              | -0.07 | 34 (3.4)             | 2142 (3.2)              | 0.01  | 26 (5.0)           | 1116 (3.2)              | 0.09  |
| Endocrinologists                                  | 53 (4.5)             | 2173 (2.1)               | 0.13  | 40 (2.8)             | 1849 (2.3)              | 0.03  | 33 (3.3)             | 1583 (2.4)              | 0.05  | 19 (3.6)           | 760 (2.2)               | 0.09  |
| Internists                                        | 580 (48.9)           | 64101 (62.4)             | -0.27 | 663 (46.2)           | 51593 (64.9)            | -0.38 | 453 (45.0)           | 43648 (66.0)            | -0.43 | 238 (45.4)         | 22162 (63.1)            | -0.36 |
| Nurse practitioners or physician assistants       | 18 (1.5)             | 2662 (2.6)               | -0.08 | 36 (2.5)             | 2848 (3.6)              | -0.06 | 46 (4.6)             | 3160 (4.8)              | -0.01 | 24 (4.6)           | 2174 (6.2)              | -0.07 |
| <b>Healthcare utilization</b>                     |                      |                          |       |                      |                         |       |                      |                         |       |                    |                         |       |
| Any recent hospitalization††                      | 13 (1.1)             | 2832 (2.8)               | -0.12 | 8 (0.6)              | 2121 (2.7)              | -0.17 | 10 (1.0)             | 1843 (2.8)              | -0.13 | 10 (1.9)           | 1042 (3.0)              | -0.07 |
| Average length of hospitalization (mean, std.dev) | 0.12 (0.63)          | 0.12 (0.51)              | 0.00  | 0.09 (0.39)          | 0.12 (0.49)             | -0.05 | 0.10 (0.46)          | 0.11 (0.50)             | -0.03 | 0.07 (0.30)        | 0.10 (0.44)             | -0.09 |
| Number of ED visits (mean, Std.dev)               | 0.49 (1.06)          | 0.52 (1.21)              | -0.03 | 0.50 (1.08)          | 0.56 (1.35)             | -0.04 | 0.50 (1.07)          | 0.56 (1.37)             | -0.06 | 0.55 (1.35)        | 0.57 (1.28)             | -0.01 |
| Number of office visits (mean, std.dev)           | 11.71 (10.59)        | 10.36 (10.78)            | 0.13  | 11.52 (11.05)        | 10.35 (10.76)           | 0.11  | 11.85 (11.74)        | 10.38 (10.88)           | 0.13  | 11.13 (10.97)      | 10.27 (11.11)           | 0.08  |
| Number of HbA1c tests ordered (mean, std.dev)     | 1.56 (1.13)          | 1.27 (1.04)              | 0.27  | 1.57 (1.09)          | 1.31 (1.02)             | 0.25  | 1.58 (1.11)          | 1.32 (0.99)             | 0.25  | 1.56 (1.17)        | 1.35 (0.97)             | 0.19  |
| Brand/Generic ratio# (mean, std.dev)              | -1.28 (1.20)         | -1.46 (1.18)             | 0.16  | -1.47 (1.20)         | -1.65 (1.15)            | 0.15  | -1.62 (1.20)         | -1.79 (1.14)            | 0.14  | -1.64 (1.17)       | -1.86 (1.11)            | 0.20  |
| Number of unique medications (mean, std.dev)      | 10.26 (8.23)         | 9.25 (7.09)              | 0.13  | 9.51 (7.68)          | 9.30 (7.23)             | 0.03  | 9.71 (7.60)          | 9.32 (7.25)             | 0.05  | 9.07 (7.74)        | 9.16 (7.24)             | -0.01 |
| Copay for pharmacy cost (\$, mean, std.dev)       | 271.76<br>(375.89)   | 246.81<br>(343.90)       | 0.07  | 234.99<br>(344.73)   | 206.07<br>(393.21)      | 0.08  | 205.19<br>(318.81)   | 182.64<br>(360.46)      | 0.07  | 165.76<br>(270.54) | 159.62<br>(356.63)      | 0.02  |
| Preventive healthcare service###                  | 808 (68.1)           | 68093 (66.3)             | 0.04  | 943 (65.8)           | 52410 (65.9)            | 0.00  | 669 (66.4)           | 44267 (67.0)            | -0.01 | 331 (63.2)         | 23526 (67.0)            | -0.08 |
| <b>Concomitant medications</b>                    |                      |                          |       |                      |                         |       |                      |                         |       |                    |                         |       |
| ACE inhibitors or ARBs                            | 556 (46.8)           | 56032 (54.5)             | -0.15 | 714 (49.8)           | 43385 (54.5)            | -0.10 | 506 (50.2)           | 35725 (54.0)            | -0.08 | 254 (48.5)         | 18567 (52.9)            | -0.09 |
| Antithrombotic medications                        | 120 (10.1)           | 10025 (9.8)              | 0.01  | 110 (7.7)            | 7717 (9.7)              | -0.07 | 120 (11.9)           | 6772 (10.2)             | 0.05  | 70 (13.4)          | 3423 (9.8)              | 0.11  |
| Beta blockers                                     | 269 (22.7)           | 27348 (26.6)             | -0.09 | 327 (22.8)           | 20425 (25.7)            | -0.07 | 242 (24.0)           | 16665 (25.2)            | -0.03 | 127 (24.2)         | 8106 (23.1)             | 0.03  |
| Calcium channel blockers                          | 208 (17.5)           | 20923 (20.4)             | -0.07 | 260 (18.1)           | 16889 (21.2)            | -0.08 | 227 (22.5)           | 14333 (21.7)            | 0.02  | 106 (20.2)         | 7453 (21.2)             | -0.02 |
| Loop diuretics                                    | 79 (6.7)             | 6097 (5.9)               | 0.03  | 100 (7.0)            | 4633 (5.8)              | 0.05  | 75 (7.4)             | 3802 (5.8)              | 0.07  | 29 (5.5)           | 1655 (4.7)              | 0.04  |
| Statin                                            | 501 (42.2)           | 52086 (50.7)             | -0.17 | 619 (43.2)           | 39423 (49.6)            | -0.13 | 444 (44.1)           | 32297 (48.9)            | -0.10 | 240 (45.8)         | 17000 (48.4)            | -0.05 |
| Thiazides                                         | 110 (9.3)            | 13338 (13.0)             | -0.12 | 151 (10.5)           | 10305 (13.0)            | -0.08 | 101 (10.0)           | 8778 (13.3)             | -0.10 | 51 (9.7)           | 4654 (13.3)             | -0.11 |

| Laboratory values                                             |                    |                    |       |                |                    |       |                    |                    |       |                    |                    |       |
|---------------------------------------------------------------|--------------------|--------------------|-------|----------------|--------------------|-------|--------------------|--------------------|-------|--------------------|--------------------|-------|
| HbA1c <sup>§</sup> (%; mean, std.dev)                         | 7.76 (2.02)        | 7.42 (1.57)        | 0.19  | 7.49 (1.46)    | 7.34 (1.57)        | 0.10  | 7.41 (1.72)        | 7.35 (1.55)        | 0.04  | 8.36 (2.38)        | 7.16 (1.41)        | 0.61  |
| Missing                                                       | 1101 (92.8)        | 95874 (93.3)       | -0.02 | 1323 (92.3)    | 73434 (92.3)       | 0.00  | 929 (92.3)         | 61114 (92.4)       | -0.01 | 499 (95.2)         | 33916 (96.6)       | -0.07 |
| eGFR <sup>¶</sup> (mL/min/1.73m <sup>2</sup> ; mean, std.dev) | 100.54 (17.70)     | 100.25 (15.65)     | 0.02  | 100.16 (19.68) | 99.81 (15.66)      | 0.02  | 104.66 (15.87)     | 99.79 (16.03)      | 0.30  | 100.21 (18.60)     | 101.07 (15.55)     | -0.05 |
| Missing                                                       | 1097 (92.4)        | 96319 (93.7)       | -0.05 | 1306 (91.1)    | 72827 (91.6)       | -0.02 | 920 (91.4)         | 60458 (91.4)       | 0.00  | 494 (94.3)         | 33754 (96.2)       | -0.09 |
| LDL (mg/dl; mean, std.dev)                                    | 97.11 (49.48)      | 97.90 (45.72)      | -0.02 | 104.30 (38.39) | 103.79 (41.02)     | 0.01  | 101.37 (37.49)     | 105.26 (41.22)     | -0.10 | 85.22 (48.29)      | 104.54 (39.82)     | -0.44 |
| Missing                                                       | 1097 (92.4)        | 95364 (92.8)       | -0.01 | 1323 (92.3)    | 73200 (92.0)       | 0.01  | 929 (92.3)         | 60934 (92.2)       | 0.00  | 497 (94.8)         | 33830 (96.4)       | -0.08 |
| HDL (mg/dl; mean, std.dev)                                    | 45.68 (17.07)      | 45.29 (93.05)      | 0.01  | 46.02 (11.22)  | 46.25 (14.28)      | -0.02 | 45.44 (13.82)      | 46.93 (64.58)      | -0.03 | 44.19 (12.77)      | 46.02 (13.09)      | -0.14 |
| Missing                                                       | 1099 (92.6)        | 95731 (93.2)       | -0.02 | 1330 (92.7)    | 73443 (92.3)       | 0.02  | 929 (92.3)         | 60894 (92.1)       | 0.01  | 497 (94.8)         | 33830 (96.4)       | -0.08 |
| Total cholesterol (mg/dl; mean, std.dev)                      | 182.02 (59.98)     | 178.11 (61.90)     | 0.06  | 187.16 (41.10) | 189.82 (46.09)     | -0.06 | 181.54 (48.74)     | 190.30 (46.51)     | -0.18 | 183.85 (43.39)     | 186.69 (41.44)     | -0.07 |
| Missing                                                       | 1097 (92.4)        | 95906 (93.3)       | -0.04 | 1329 (92.7)    | 73420 (92.3)       | 0.01  | 927 (92.1)         | 60899 (92.1)       | 0.00  | 497 (94.8)         | 33821 (96.4)       | -0.07 |
| Triglyceride (mg/dl; mean, std.dev)                           | 173.12<br>(111.47) | 174.07<br>(154.87) | -0.01 | 164.62 (93.73) | 184.51<br>(163.93) | -0.15 | 165.50<br>(124.01) | 184.15<br>(190.02) | -0.12 | 249.30<br>(228.27) | 181.38<br>(161.61) | 0.34  |
| Missing                                                       | 1098 (92.5)        | 95882 (93.3)       | -0.03 | 1328 (92.6)    | 73526 (92.4)       | 0.01  | 927 (92.1)         | 60946 (92.2)       | 0.00  | 497 (94.8)         | 33840 (96.4)       | -0.08 |

SD: standardized difference; std.dev: standard deviation; HbA1c: hemoglobin A1c; CVD: cardiovascular disease; CKD: chronic kidney disease; COPD: chronic obstructive pulmonary disease; ED: emergency department.

\* Northeast (CT, MA, ME, NH, NJ, NY, PA, RI, VT)

South (AL, AR, DC, DE, FL, GA, KY, LA, MD, MS, NC, OK, SC, TN, TX, VA, WV)

Midwest (IA, IL, IN, KS, MI, MN, MO, ND, NE, OH, SD, WI)

West (AK, AZ, CA, CO, HI, ID, MT, NM, NV, OR, UT, WA, WY)

\*\* Defined as a history of myocardial infarction, stable or unstable angina, other ischemic heart diseases, transient ischemic attack, stroke, atherosclerotic peripheral vascular disease, or heart failure.

† Defined as specialist visits occurred within 7 days prior to cohort entry.

†† Defined as hospitalization occurred within 30 days prior to cohort entry.

# Added 1 to both numerator and denominator, then log-transformed.

### Defined as administration of bone mineral density (BMD) test, colonoscopy, fecal occult blood test, mammography, pap smear, prostate-specific antigen (PSA) test, flu vaccine, or pneumococcal vaccine.

§ Measured 180 days prior to or on cohort entry.

¶ Estimated using the quadratic GFR equation:  $GFR = \exp(1.911 + \frac{5.249}{Serum\ creatinine} - \frac{2.114}{Serum\ creatinine^2} - 0.00686 * Age - 0.205 (if\ female))$ . If serum creatinine <0.8 mg/dL, use 0.8 for serum creatinine.

**Table S4. [Medicare] Patient characteristics and standardized differences at the time of first-line SGLT-2i and metformin initiation (2013-2018). Values are number (percentage) unless otherwise specified.**

| Baseline characteristics                          | Apr2013-Dec2014    |                          |       | Jan2015-Jun2016    |                          |       | Jul2016-Dec2017    |                         |       | Jan2018-Dec2018    |                         |       |
|---------------------------------------------------|--------------------|--------------------------|-------|--------------------|--------------------------|-------|--------------------|-------------------------|-------|--------------------|-------------------------|-------|
|                                                   | SGLT-2i<br>(n=359) | Metformin<br>(n=119,599) | SD    | SGLT-2i<br>(n=843) | Metformin<br>(n=101,812) | SD    | SGLT-2i<br>(n=669) | Metformin<br>(n=58,218) | SD    | SGLT-2i<br>(n=505) | Metformin<br>(n=34,032) | SD    |
| <b>Demographics</b>                               |                    |                          |       |                    |                          |       |                    |                         |       |                    |                         |       |
| Age (mean, std.dev)                               | 71.81 (5.41)       | 73.02 (5.99)             | -0.21 | 71.78 (5.54)       | 72.98 (5.89)             | -0.21 | 71.68 (5.51)       | 73.23 (5.99)            | -0.27 | 72.81 (6.14)       | 73.04 (5.92)            | -0.04 |
| Gender (Male)                                     | 186 (51.8)         | 53960 (45.1)             | 0.13  | 451 (53.5)         | 47858 (47.0)             | 0.13  | 355 (53.1)         | 28291 (48.6)            | 0.09  | 279 (55.2)         | 16995 (49.9)            | 0.11  |
| Region*                                           |                    |                          |       |                    |                          |       |                    |                         |       |                    |                         |       |
| Northeast                                         | 86 (24.0)          | 21140 (17.7)             | 0.16  | 211 (25.0)         | 20266 (19.9)             | 0.12  | 153 (22.9)         | 11912 (20.5)            | 0.06  | 102 (20.2)         | 6713 (19.7)             | 0.01  |
| South                                             | 145 (40.4)         | 49533 (41.4)             | -0.02 | 368 (43.7)         | 41663 (40.9)             | 0.06  | 285 (42.6)         | 23510 (40.4)            | 0.05  | 194 (38.4)         | 13267 (39.0)            | -0.01 |
| Midwest                                           | 66 (18.4)          | 28104 (23.5)             | -0.13 | 110 (13.0)         | 21954 (21.6)             | -0.23 | 97 (14.5)          | 12361 (21.2)            | -0.18 | 81 (16.0)          | 7653 (22.5)             | -0.16 |
| West                                              | 62 (17.3)          | 20822 (17.4)             | 0.00  | 154 (18.3)         | 17929 (17.6)             | 0.02  | 134 (20.0)         | 10435 (17.9)            | 0.05  | 128 (25.3)         | 6399 (18.8)             | 0.16  |
| Medicare Advantage                                | NA                 | NA                       | NA    | NA                 | NA                       | NA    | NA                 | NA                      | NA    | NA                 | NA                      | NA    |
| Race (White)                                      | 301 (83.8)         | 99119 (82.9)             | 0.03  | 716 (84.9)         | 85001 (83.5)             | 0.04  | 545 (81.5)         | 48398 (83.1)            | -0.04 | 417 (82.6)         | 28450 (83.6)            | -0.03 |
| <b>Life-style risk factors</b>                    |                    |                          |       |                    |                          |       |                    |                         |       |                    |                         |       |
| Obesity or Overweight                             | 102 (28.4)         | 27262 (22.8)             | 0.13  | 310 (36.8)         | 29852 (29.3)             | 0.16  | 269 (40.2)         | 22063 (37.9)            | 0.05  | 236 (46.7)         | 15775 (46.4)            | 0.01  |
| Smoking                                           | 60 (16.7)          | 20226 (16.9)             | -0.01 | 172 (20.4)         | 20351 (20.0)             | 0.01  | 162 (24.2)         | 13783 (23.7)            | 0.01  | 117 (23.2)         | 8759 (25.7)             | -0.06 |
| <b>Comorbidities</b>                              |                    |                          |       |                    |                          |       |                    |                         |       |                    |                         |       |
| Diabetic Nephropathy                              | 16 (4.5)           | 2199 (1.8)               | 0.15  | 44 (5.2)           | 2674 (2.6)               | 0.13  | 52 (7.8)           | 3446 (5.9)              | 0.07  | 58 (11.5)          | 2574 (7.6)              | 0.13  |
| Diabetic Neuropathy                               | 55 (15.3)          | 6753 (5.6)               | 0.32  | 97 (11.5)          | 6534 (6.4)               | 0.18  | 86 (12.9)          | 5331 (9.2)              | 0.12  | 86 (17.0)          | 3221 (9.5)              | 0.22  |
| Diabetic Retinopathy                              | 14 (3.9)           | 1789 (1.5)               | 0.15  | 25 (3.0)           | 1434 (1.4)               | 0.11  | 15 (2.2)           | 1036 (1.8)              | 0.03  | 30 (5.9)           | 811 (2.4)               | 0.18  |
| CVD**                                             | 184 (51.3)         | 49978 (41.8)             | 0.19  | 395 (46.9)         | 42098 (41.3)             | 0.11  | 337 (50.4)         | 25678 (44.1)            | 0.13  | 289 (57.2)         | 15103 (44.4)            | 0.26  |
| Hyperlipidemia                                    | 317 (88.3)         | 100952 (84.4)            | 0.11  | 717 (85.1)         | 84699 (83.2)             | 0.05  | 563 (84.2)         | 47396 (81.4)            | 0.07  | 430 (85.1)         | 28883 (84.9)            | 0.01  |
| Hypertension                                      | 317 (88.3)         | 100961 (84.4)            | 0.11  | 753 (89.3)         | 86502 (85.0)             | 0.13  | 596 (89.1)         | 50359 (86.5)            | 0.08  | 448 (88.7)         | 29411 (86.4)            | 0.07  |
| CKD                                               | 36 (10.0)          | 8857 (7.4)               | 0.09  | 113 (13.4)         | 8655 (8.5)               | 0.16  | 104 (15.5)         | 6272 (10.8)             | 0.14  | 105 (20.8)         | 4176 (12.3)             | 0.23  |
| COPD                                              | 60 (16.7)          | 18737 (15.7)             | 0.03  | 133 (15.8)         | 15465 (15.2)             | 0.02  | 110 (16.4)         | 9083 (15.6)             | 0.02  | 78 (15.4)          | 5386 (15.8)             | -0.01 |
| History of Malignant Neoplasm                     | 62 (17.3)          | 17625 (14.7)             | 0.07  | 147 (17.4)         | 15149 (14.9)             | 0.07  | 98 (14.6)          | 8870 (15.2)             | -0.02 | 84 (16.6)          | 5212 (15.3)             | 0.04  |
| <b>Physician specialties†</b>                     |                    |                          |       |                    |                          |       |                    |                         |       |                    |                         |       |
| Cardiologists                                     | 24 (6.7)           | 9275 (7.8)               | -0.04 | 45 (5.3)           | 7319 (7.2)               | -0.08 | 49 (7.3)           | 4068 (7.0)              | 0.01  | 53 (10.5)          | 2448 (7.2)              | 0.12  |
| Endocrinologists                                  | 10 (2.8)           | 2852 (2.4)               | 0.03  | 47 (5.6)           | 2660 (2.6)               | 0.15  | 29 (4.3)           | 1673 (2.9)              | 0.08  | 25 (5.0)           | 977 (2.9)               | 0.11  |
| Internists                                        | 162 (45.1)         | 76305 (63.8)             | -0.38 | 387 (45.9)         | 66298 (65.1)             | -0.39 | 319 (47.7)         | 37630 (64.6)            | -0.35 | 222 (44.0)         | 21715 (63.8)            | -0.41 |
| Nurse practitioners or physician assistants       | 16 (4.5)           | 9235 (7.7)               | -0.14 | 40 (4.7)           | 9105 (8.9)               | -0.17 | 50 (7.5)           | 5876 (10.1)             | -0.09 | 47 (9.3)           | 4209 (12.4)             | -0.10 |
| <b>Healthcare utilization</b>                     |                    |                          |       |                    |                          |       |                    |                         |       |                    |                         |       |
| Any recent hospitalization††                      | 6 (1.7)            | 6607 (5.5)               | -0.21 | 20 (2.4)           | 5148 (5.1)               | -0.14 | 14 (2.1)           | 2690 (4.6)              | -0.14 | 13 (2.6)           | 1794 (5.3)              | -0.14 |
| Average length of hospitalization (mean, std.dev) | 0.67 (2.17)        | 0.79 (2.58)              | -0.05 | 0.73 (2.50)        | 0.76 (2.48)              | -0.01 | 0.72 (2.12)        | 0.78 (2.47)             | -0.02 | 0.64 (2.01)        | 0.80 (2.44)             | -0.07 |
| Number of ED visits (mean, Std.dev)               | 0.45 (1.15)        | 0.47 (1.10)              | -0.02 | 0.42 (0.95)        | 0.47 (1.12)              | -0.05 | 0.41 (1.07)        | 0.49 (1.14)             | -0.07 | 0.44 (0.89)        | 0.51 (1.18)             | -0.07 |
| Number of office visits (mean, std.dev)           | 11.22 (8.30)       | 9.26 (7.26)              | 0.25  | 10.98 (8.00)       | 9.29 (7.16)              | 0.22  | 11.09 (7.71)       | 9.71 (7.20)             | 0.18  | 11.83 (8.56)       | 9.78 (7.29)             | 0.26  |
| Number of HbA1c tests ordered (mean, std.dev)     | 2.07 (1.32)        | 1.75 (1.13)              | 0.26  | 2.10 (1.25)        | 1.84 (1.13)              | 0.23  | 2.16 (1.23)        | 2.06 (1.11)             | 0.08  | 2.22 (1.28)        | 2.11 (1.10)             | 0.09  |
| Brand/Generic ratio# (mean, std.dev)              | -1.31 (1.15)       | -1.72 (1.19)             | 0.35  | -1.56 (1.16)       | -1.91 (1.15)             | 0.30  | -1.86 (1.19)       | -2.08 (1.12)            | 0.19  | -1.95 (1.16)       | -2.21 (1.08)            | 0.23  |
| Number of unique medications (mean, std.dev)      | 12.97 (8.78)       | 11.76 (7.77)             | 0.15  | 12.68 (8.68)       | 11.77 (7.81)             | 0.11  | 12.85 (8.99)       | 11.77 (7.76)            | 0.13  | 13.35 (8.86)       | 12.16 (8.08)            | 0.14  |
| Copay for pharmacy cost (\$, mean, std.dev)       | 494.04<br>(586.60) | 433.79<br>(612.31)       | 0.10  | 528.92<br>(673.23) | 435.57<br>(661.47)       | 0.14  | 505.94<br>(748.85) | 433.66<br>(669.16)      | 0.10  | 512.75<br>(756.37) | 425.59<br>(668.98)      | 0.12  |
| Preventive healthcare service###                  | 299 (83.3)         | 100829 (84.3)            | -0.03 | 727 (86.2)         | 87098 (85.5)             | 0.02  | 559 (83.6)         | 50585 (86.9)            | -0.09 | 440 (87.1)         | 29945 (88.0)            | -0.03 |
| <b>Concomitant medications</b>                    |                    |                          |       |                    |                          |       |                    |                         |       |                    |                         |       |
| ACE inhibitors or ARBs                            | 212 (59.1)         | 75557 (63.2)             | -0.08 | 508 (60.3)         | 64968 (63.8)             | -0.07 | 416 (62.2)         | 37894 (65.1)            | -0.06 | 304 (60.2)         | 22161 (65.1)            | -0.10 |
| Antithrombotic medications                        | 95 (26.5)          | 25963 (21.7)             | 0.11  | 201 (23.8)         | 21924 (21.5)             | 0.06  | 181 (27.1)         | 13654 (23.5)            | 0.08  | 159 (31.5)         | 8201 (24.1)             | 0.17  |
| Beta blockers                                     | 159 (44.3)         | 54428 (45.5)             | -0.02 | 370 (43.9)         | 45801 (45.0)             | -0.02 | 304 (45.4)         | 27087 (46.5)            | -0.02 | 247 (48.9)         | 15647 (46.0)            | 0.06  |
| Calcium channel blockers                          | 106 (29.5)         | 38089 (31.8)             | -0.05 | 260 (30.8)         | 32041 (31.5)             | -0.01 | 204 (30.5)         | 18653 (32.0)            | -0.03 | 143 (28.3)         | 10946 (32.2)            | -0.08 |
| Loop diuretics                                    | 52 (14.5)          | 17521 (14.6)             | 0.00  | 154 (18.3)         | 14636 (14.4)             | 0.11  | 97 (14.5)          | 9153 (15.7)             | -0.03 | 96 (19.0)          | 5412 (15.9)             | 0.08  |
| Statin                                            | 211 (58.8)         | 79524 (66.5)             | -0.16 | 506 (60.0)         | 68630 (67.4)             | -0.15 | 440 (65.8)         | 40820 (70.1)            | -0.09 | 326 (64.6)         | 24189 (71.1)            | -0.14 |
| Thiazides                                         | 59 (16.4)          | 21141 (17.7)             | -0.03 | 109 (12.9)         | 17566 (17.3)             | -0.12 | 107 (16.0)         | 9826 (16.9)             | -0.02 | 78 (15.4)          | 5704 (16.8)             | -0.04 |



SD: standardized difference; std.dev: standard deviation; HbA1c: hemoglobin A1c; CVD: cardiovascular disease; CKD: chronic kidney disease; COPD: chronic obstructive pulmonary disease; ED: emergency department.

\* Northeast (CT, MA, ME, NH, NJ, NY, PA, RI, VT)

South (AL, AR, DC, DE, FL, GA, KY, LA, MD, MS, NC, OK, SC, TN, TX, VA, WV)

Midwest (IA, IL, IN, KS, MI, MN, MO, ND, NE, OH, SD, WI)

West (AK, AZ, CA, CO, HI, ID, MT, NM, NV, OR, UT, WA, WY)

\*\* Defined as a history of myocardial infarction, stable or unstable angina, other ischemic heart diseases, transient ischemic attack, stroke, atherosclerotic peripheral vascular disease, or heart failure.

† Defined as specialist visits occurred within 7 days prior to cohort entry.

†† Defined as hospitalization occurred within 30 days prior to cohort entry.

# Added 1 to both numerator and denominator, then log-transformed.

### Defined as administration of bone mineral density (BMD) test, colonoscopy, fecal occult blood test, mammography, pap smear, prostate-specific antigen (PSA) test, flu vaccine, or pneumococcal vaccine.

**Table S5. [Sensitivity analysis] Patient characteristics and standardized differences at the time of first-line SGLT-2i and metformin initiation (2013-2019). Values are percentage (%) unless otherwise specified.**

|                                                 | Apr2013-<br>Dec2014  |                          |       | Jan2015-<br>Jun2016  |                          |       | Jul2016-<br>Dec2017  |                          |       | Jan2018-<br>Dec2019  |                         |       | Linear<br>trend<br>(P) |
|-------------------------------------------------|----------------------|--------------------------|-------|----------------------|--------------------------|-------|----------------------|--------------------------|-------|----------------------|-------------------------|-------|------------------------|
| <b>Baseline characteristics</b>                 | SGLT-2i<br>(n=1,223) | Metformin<br>(n=167,168) | SD    | SGLT2-i<br>(n=1,934) | Metformin<br>(n=177,793) | SD    | SGLT2-i<br>(n=1,563) | Metformin<br>(n=126,291) | SD    | SGLT2-i<br>(n=1,286) | Metformin<br>(n=91,801) | SD    |                        |
| <b>Demographics</b>                             |                      |                          |       |                      |                          |       |                      |                          |       |                      |                         |       |                        |
| Age (mean, std.dev)                             | 56.90 (9.17)         | 62.71 (10.18)            | -0.22 | 60.91 (8.63)         | 65.22 (9.30)             | -0.20 | 61.05 (9.28)         | 63.16 (10.04)            | -0.13 | 63.02 (10.79)        | 62.52 (10.87)           | 0.01  | 0.056                  |
| Gender (Male)                                   | 47.51                | 49.69                    | -0.03 | 52.33                | 49.65                    | 0.07  | 51.31                | 51.34                    | 0.01  | 57.62                | 53.42                   | 0.09  | 0.319                  |
| Region*                                         |                      |                          |       |                      |                          |       |                      |                          |       |                      |                         |       |                        |
| Northeast                                       | 17.91                | 16.65                    | 0.04  | 21.72                | 18.47                    | 0.08  | 19.39                | 17.18                    | 0.06  | 17.42                | 15.24                   | 0.05  | 0.907                  |
| South                                           | 53.31                | 41.89                    | 0.15  | 50.10                | 42.42                    | 0.13  | 53.29                | 45.03                    | 0.15  | 48.83                | 44.94                   | 0.09  | 0.261                  |
| Midwest                                         | 16.35                | 23.06                    | -0.16 | 14.79                | 21.83                    | -0.19 | 13.76                | 21.20                    | -0.20 | 17.42                | 20.94                   | -0.09 | 0.486                  |
| West                                            | 12.43                | 18.39                    | -0.09 | 13.39                | 17.28                    | -0.07 | 13.56                | 16.59                    | -0.07 | 16.33                | 18.88                   | -0.09 | 0.811                  |
| Medicare Advantage                              | 10.07                | 25.77                    | -0.42 | 14.12                | 26.88                    | -0.26 | 18.54                | 25.62                    | -0.16 | 37.03                | 35.66                   | 0.03  | 0.005                  |
| Race (White)                                    | 78.36                | 76.17                    | 0.10  | 79.55                | 77.25                    | 0.07  | 71.03                | 74.28                    | -0.06 | 66.67                | 66.54                   | -0.01 | 0.185                  |
| <b>Life-style risk factors</b>                  |                      |                          |       |                      |                          |       |                      |                          |       |                      |                         |       |                        |
| Obesity or Overweight                           | 26.66                | 23.17                    | 0.09  | 34.80                | 30.87                    | 0.10  | 42.48                | 39.80                    | 0.05  | 49.30                | 48.08                   | 0.03  | 0.082                  |
| Smoking                                         | 7.69                 | 11.46                    | -0.05 | 12.46                | 15.14                    | -0.03 | 15.48                | 16.77                    | -0.02 | 20.06                | 19.12                   | 0.02  | 0.032                  |
| <b>Comorbidities</b>                            |                      |                          |       |                      |                          |       |                      |                          |       |                      |                         |       |                        |
| Diabetic Nephropathy                            | 2.04                 | 1.68                     | 0.07  | 3.57                 | 2.71                     | 0.08  | 5.12                 | 4.03                     | 0.06  | 10.03                | 5.43                    | 0.16  | 0.315                  |
| Diabetic Neuropathy                             | 5.15                 | 3.68                     | 0.14  | 7.19                 | 5.02                     | 0.13  | 7.93                 | 5.64                     | 0.11  | 10.34                | 5.98                    | 0.15  | 0.850                  |
| Diabetic Retinopathy                            | 1.14                 | 0.90                     | 0.04  | 1.60                 | 1.01                     | 0.06  | 0.96                 | 0.91                     | 0.01  | 3.27                 | 1.30                    | 0.13  | 0.475                  |
| CVD**                                           | 19.87                | 25.63                    | 0.02  | 27.25                | 29.45                    | 0.05  | 29.62                | 26.82                    | 0.11  | 40.12                | 25.81                   | 0.30  | 0.085                  |
| Hyperlipidemia                                  | 72.53                | 70.70                    | 0.15  | 73.32                | 73.47                    | 0.06  | 69.16                | 66.47                    | 0.10  | 75.43                | 70.30                   | 0.10  | 0.67                   |
| Hypertension                                    | 67.05                | 69.37                    | 0.08  | 74.72                | 74.53                    | 0.10  | 73.90                | 72.54                    | 0.06  | 77.99                | 71.78                   | 0.13  | 0.493                  |
| CKD                                             | 3.68                 | 4.51                     | 0.04  | 6.98                 | 6.33                     | 0.07  | 8.06                 | 6.60                     | 0.07  | 13.53                | 7.65                    | 0.16  | 0.106                  |
| COPD                                            | 7.11                 | 9.16                     | 0.01  | 8.74                 | 10.77                    | -0.02 | 9.98                 | 9.47                     | 0.04  | 11.51                | 9.62                    | 0.05  | 0.277                  |
| History of Malignant Neoplasm                   | 6.87                 | 9.40                     | -0.01 | 9.72                 | 10.71                    | 0.02  | 8.77                 | 9.76                     | -0.02 | 10.26                | 8.97                    | 0.04  | 0.439                  |
| <b>Physician specialties†</b>                   |                      |                          |       |                      |                          |       |                      |                          |       |                      |                         |       |                        |
| Cardiologists                                   | 2.78                 | 4.88                     | -0.06 | 3.67                 | 5.48                     | -0.06 | 4.73                 | 5.15                     | -0.01 | 7.31                 | 5.19                    | 0.08  | 0.079                  |
| Endocrinologists                                | 4.25                 | 2.25                     | 0.09  | 3.46                 | 2.47                     | 0.07  | 3.26                 | 2.52                     | 0.04  | 4.28                 | 2.28                    | 0.11  | 0.935                  |
| Internists                                      | 48.65                | 65.30                    | -0.37 | 47.72                | 66.93                    | -0.40 | 46.32                | 67.86                    | -0.44 | 47.12                | 68.65                   | -0.45 | 0.038                  |
| Nurse practitioners or physician assistants     | 1.88                 | 4.25                     | -0.10 | 2.9                  | 5.94                     | -0.14 | 4.41                 | 6.15                     | -0.07 | 4.51                 | 6.91                    | -0.12 | 0.986                  |
| <b>Healthcare utilization</b>                   |                      |                          |       |                      |                          |       |                      |                          |       |                      |                         |       |                        |
| Any recent hospitalization††                    | 0.98                 | 3.78                     | -0.19 | 1.34                 | 3.93                     | -0.14 | 1.15                 | 3.53                     | -0.15 | 2.80                 | 3.78                    | -0.05 | 0.116                  |
| Avg. length of hospitalizations (mean, std.dev) | 0.22 (1.44)          | 0.41 (1.75)              | -0.04 | 0.37 (1.73)          | 0.48 (1.96)              | -0.02 | 0.30 (1.25)          | 0.41 (1.69)              | -0.07 | 0.41 (1.47)          | 0.44 (1.99)             | -0.05 | 0.524                  |
| Number of ED visits (mean, Std.dev)             | 0.57 (1.54)          | 0.58 (1.52)              | 0.00  | 0.53 (1.33)          | 0.57 (1.48)              | -0.03 | 0.63 (1.83)          | 0.62 (1.66)              | -0.02 | 0.77 (2.06)          | 0.72 (1.98)             | 0.01  | 0.758                  |
| Number of office visits (mean, std.dev)         | 11.59 (10.09)        | 10.06 (9.72)             | 0.18  | 11.39 (10.25)        | 9.78 (8.97)              | 0.17  | 11.78 (10.88)        | 10.03 (9.56)             | 0.18  | 11.89 (10.47)        | 10.06 (9.65)            | 0.19  | 0.396                  |
| Number of HbA1c test orders (mean, std.dev)     | 1.64 (1.16)          | 1.46 (1.07)              | 0.25  | 1.74 (1.16)          | 1.59 (1.08)              | 0.21  | 1.77 (1.17)          | 1.62 (1.04)              | 0.16  | 1.84 (1.19)          | 1.65 (1.04)             | 0.16  | 0.050                  |
| Brand/Generic ratio# (mean, std.dev)            | -1.29 (1.21)         | -1.61 (1.20)             | 0.23  | -1.53 (1.19)         | -1.79 (1.17)             | 0.22  | -1.69 (1.19)         | -1.92 (1.15)             | 0.19  | -1.86 (1.17)         | -2.02 (1.12)            | 0.15  | 0.022                  |
| Number of unique medications (mean, std.dev)    | 10.78 (8.33)         | 10.29 (7.38)             | 0.15  | 10.81 (7.98)         | 10.58 (7.52)             | 0.07  | 10.75 (8.01)         | 10.27 (7.39)             | 0.09  | 11.72 (9.29)         | 10.36 (7.67)            | 0.15  | 0.975                  |
| Copay for pharmacy cost (\$, mean, std.dev)     | 324.97<br>(440.00)   | 347.34<br>(513.62)       | 0.05  | 354.02<br>(489.98)   | 344.92<br>(561.58)       | 0.10  | 362.75<br>(661.33)   | 309.74<br>(546.57)       | 0.11  | 386.49<br>(655.31)   | 300.11<br>(540.61)      | 0.13  | 0.025                  |
| Preventive healthcare service###                | 70.24                | 73.46                    | 0.00  | 75.44                | 76.68                    | 0.03  | 72.04                | 75.54                    | -0.06 | 75.97                | 75.55                   | 0.00  | 0.733                  |
| <b>Concomitant medications</b>                  |                      |                          |       |                      |                          |       |                      |                          |       |                      |                         |       |                        |
| ACE inhibitors or ARBs                          | 64.24                | 63.52                    | -0.10 | 61.60                | 63.88                    | -0.08 | 61.41                | 65.86                    | -0.11 | 62.05                | 66.34                   | -0.06 | 0.436                  |
| Antithrombotic medications                      | 29.80                | 22.22                    | 0.02  | 26.18                | 22.42                    | 0.01  | 29.88                | 24.88                    | 0.04  | 33.66                | 25.14                   | 0.20  | 0.181                  |
| Beta blockers                                   | 51.66                | 46.63                    | -0.07 | 47.18                | 46.19                    | -0.02 | 47.53                | 48.46                    | -0.05 | 52.15                | 47.63                   | 0.10  | 0.185                  |
| Calcium channel blockers                        | 33.11                | 32.67                    | -0.06 | 32.13                | 32.21                    | -0.02 | 30.59                | 33.05                    | -0.02 | 30.36                | 32.45                   | -0.03 | 0.314                  |
| Loop diuretics                                  | 19.21                | 15.02                    | 0.04  | 19.28                | 15.05                    | 0.06  | 17.65                | 16.66                    | 0.03  | 22.11                | 16.63                   | 0.11  | 0.337                  |
| Statin                                          | 61.59                | 67.58                    | -0.19 | 59.72                | 68.14                    | -0.16 | 67.53                | 71.30                    | -0.10 | 65.68                | 72.74                   | -0.08 | 0.008                  |
| Thiazides                                       | 11.28                | 14.86                    | -0.05 | 11.89                | 15.09                    | -0.08 | 11.20                | 14.66                    | -0.10 | 12.05                | 14.76                   | -0.09 | 0.182                  |
| <b>Laboratory values</b>                        |                      |                          |       |                      |                          |       |                      |                          |       |                      |                         |       |                        |

|                                                               |                 |                 |       |                 |                 |       |                 |                 |       |                 |                 |       |       |
|---------------------------------------------------------------|-----------------|-----------------|-------|-----------------|-----------------|-------|-----------------|-----------------|-------|-----------------|-----------------|-------|-------|
| HbA1c <sup>§</sup> (%; mean, std.dev)                         | 7.34 (1.80)     | 7.38 (1.54)     | 0.01  | 7.37 (1.41)     | 7.31 (1.53)     | 0.06  | 7.46 (1.77)     | 7.33 (1.53)     | 0.08  | 7.59 (1.62)     | 7.27 (1.52)     | 0.20  | 0.053 |
| Missing                                                       | 87.31           | 83.64           | 0.02  | 82.79           | 79.36           | -0.03 | 76.63           | 76.64           | -0.01 | 69.18           | 68.84           | 0.00  | 0.785 |
| eGFR <sup>¶</sup> (mL/min/1.73m <sup>2</sup> ; mean, std.dev) | 101.24 (17.21)  | 99.27 (16.20)   | 0.14  | 99.92 (17.20)   | 98.53 (16.12)   | 0.08  | 101.58 (16.42)  | 98.25 (16.52)   | 0.20  | 93.73 (19.73)   | 97.02 (16.74)   | -0.18 | 0.355 |
| Missing                                                       | 85.91           | 82.36           | -0.01 | 81.33           | 77.93           | -0.04 | 75.04           | 75.18           | -0.01 | 67.34           | 67.74           | -0.02 | 0.946 |
| LDL (mg/dl; mean, std.dev)                                    | 104.45 (47.26)  | 98.17 (44.15)   | 0.13  | 103.07 (41.01)  | 101.94 (40.90)  | 0.00  | 98.62 (39.96)   | 103.09 (40.78)  | -0.11 | 90.53 (39.88)   | 100.66 (40.12)  | -0.25 | <.001 |
| Missing                                                       | 86.57           | 83.09           | 0.01  | 83.49           | 79.69           | -0.01 | 77.50           | 77.44           | 0.00  | 71.82           | 71.24           | 0.00  | 0.811 |
| HDL (mg/dl; mean, std.dev)                                    | 46.29 (15.45)   | 45.90 (87.99)   | -0.02 | 45.35 (12.31)   | 46.51 (14.26)   | -0.09 | 45.75 (14.42)   | 47.14 (57.43)   | -0.04 | 45.23 (13.48)   | 46.07 (13.14)   | -0.07 | 0.602 |
| Missing                                                       | 86.29           | 83.42           | -0.01 | 83.49           | 80.42           | -0.03 | 77.94           | 78.16           | -0.01 | 72.02           | 72.34           | -0.02 | 0.954 |
| Total cholesterol (mg/dl; mean, std.dev)                      | 187.62 (56.66)  | 179.65 (58.22)  | 0.12  | 186.99 (42.80)  | 188.19 (45.64)  | -0.05 | 178.58 (50.03)  | 188.40 (45.84)  | -0.20 | 175.38 (40.28)  | 183.86 (43.73)  | -0.20 | 0.065 |
| Missing                                                       | 86.19           | 83.44           | -0.01 | 83.49           | 80.14           | -0.02 | 77.42           | 77.77           | -0.01 | 71.92           | 71.67           | 0.00  | 0.322 |
| Triglyceride (mg/dl; mean, std.dev)                           | 172.37 (101.81) | 176.49 (154.38) | -0.03 | 171.74 (123.90) | 183.40 (158.43) | -0.07 | 170.56 (132.48) | 183.28 (180.34) | -0.08 | 191.84 (184.30) | 181.40 (153.83) | 0.07  | 0.446 |
| Missing                                                       | 86.38           | 83.47           | -0.01 | 83.56           | 80.45           | -0.03 | 77.42           | 78.01           | -0.02 | 71.92           | 71.84           | -0.01 | 0.824 |

SD: standardized difference; std.dev: standard deviation; HbA1c: hemoglobin A1c; CVD: cardiovascular disease; CKD: chronic kidney disease; COPD: chronic obstructive pulmonary disease; ED: emergency department.

\* Northeast (CT, MA, ME, NH, NJ, NY, PA, RI, VT)

South (AL, AR, DC, DE, FL, GA, KY, LA, MD, MS, NC, OK, SC, TN, TX, VA, WV)

Midwest (IA, IL, IN, KS, MI, MN, MO, ND, NE, OH, SD, WI)

West (AK, AZ, CA, CO, HI, ID, MT, NM, NV, OR, UT, WA, WY)

\*\* Defined as a history of myocardial infarction, stable or unstable angina, other ischemic heart diseases, transient ischemic attack, stroke, atherosclerotic peripheral vascular disease, or heart failure.

† Defined as specialist visits occurred within 7 days prior to cohort entry.

†† Defined as hospitalization occurred within 30 days prior to cohort entry.

# Added 1 to both numerator and denominator, then log-transformed.

## Defined as administration of bone mineral density (BMD) test, colonoscopy, fecal occult blood test, mammography, pap smear, prostate-specific antigen (PSA) test, flu vaccine, or pneumococcal vaccine.

§ Measured 180 days prior to or on cohort entry.

¶ Estimated using the quadratic GFR equation:  $GFR = \exp(1.911 + \frac{5.249}{Serum\ creatinine} - \frac{2.114}{Serum\ creatinine^2} - 0.00686 * Age - 0.205 (if\ female))$ . If serum creatinine <0.8 mg/dL, use 0.8 for serum creatinine.

**Figure S2. [Sensitivity analysis] Trends of standardized differences (SDs) of selected patient characteristics, comparing first-line SGLT-2i versus metformin.**

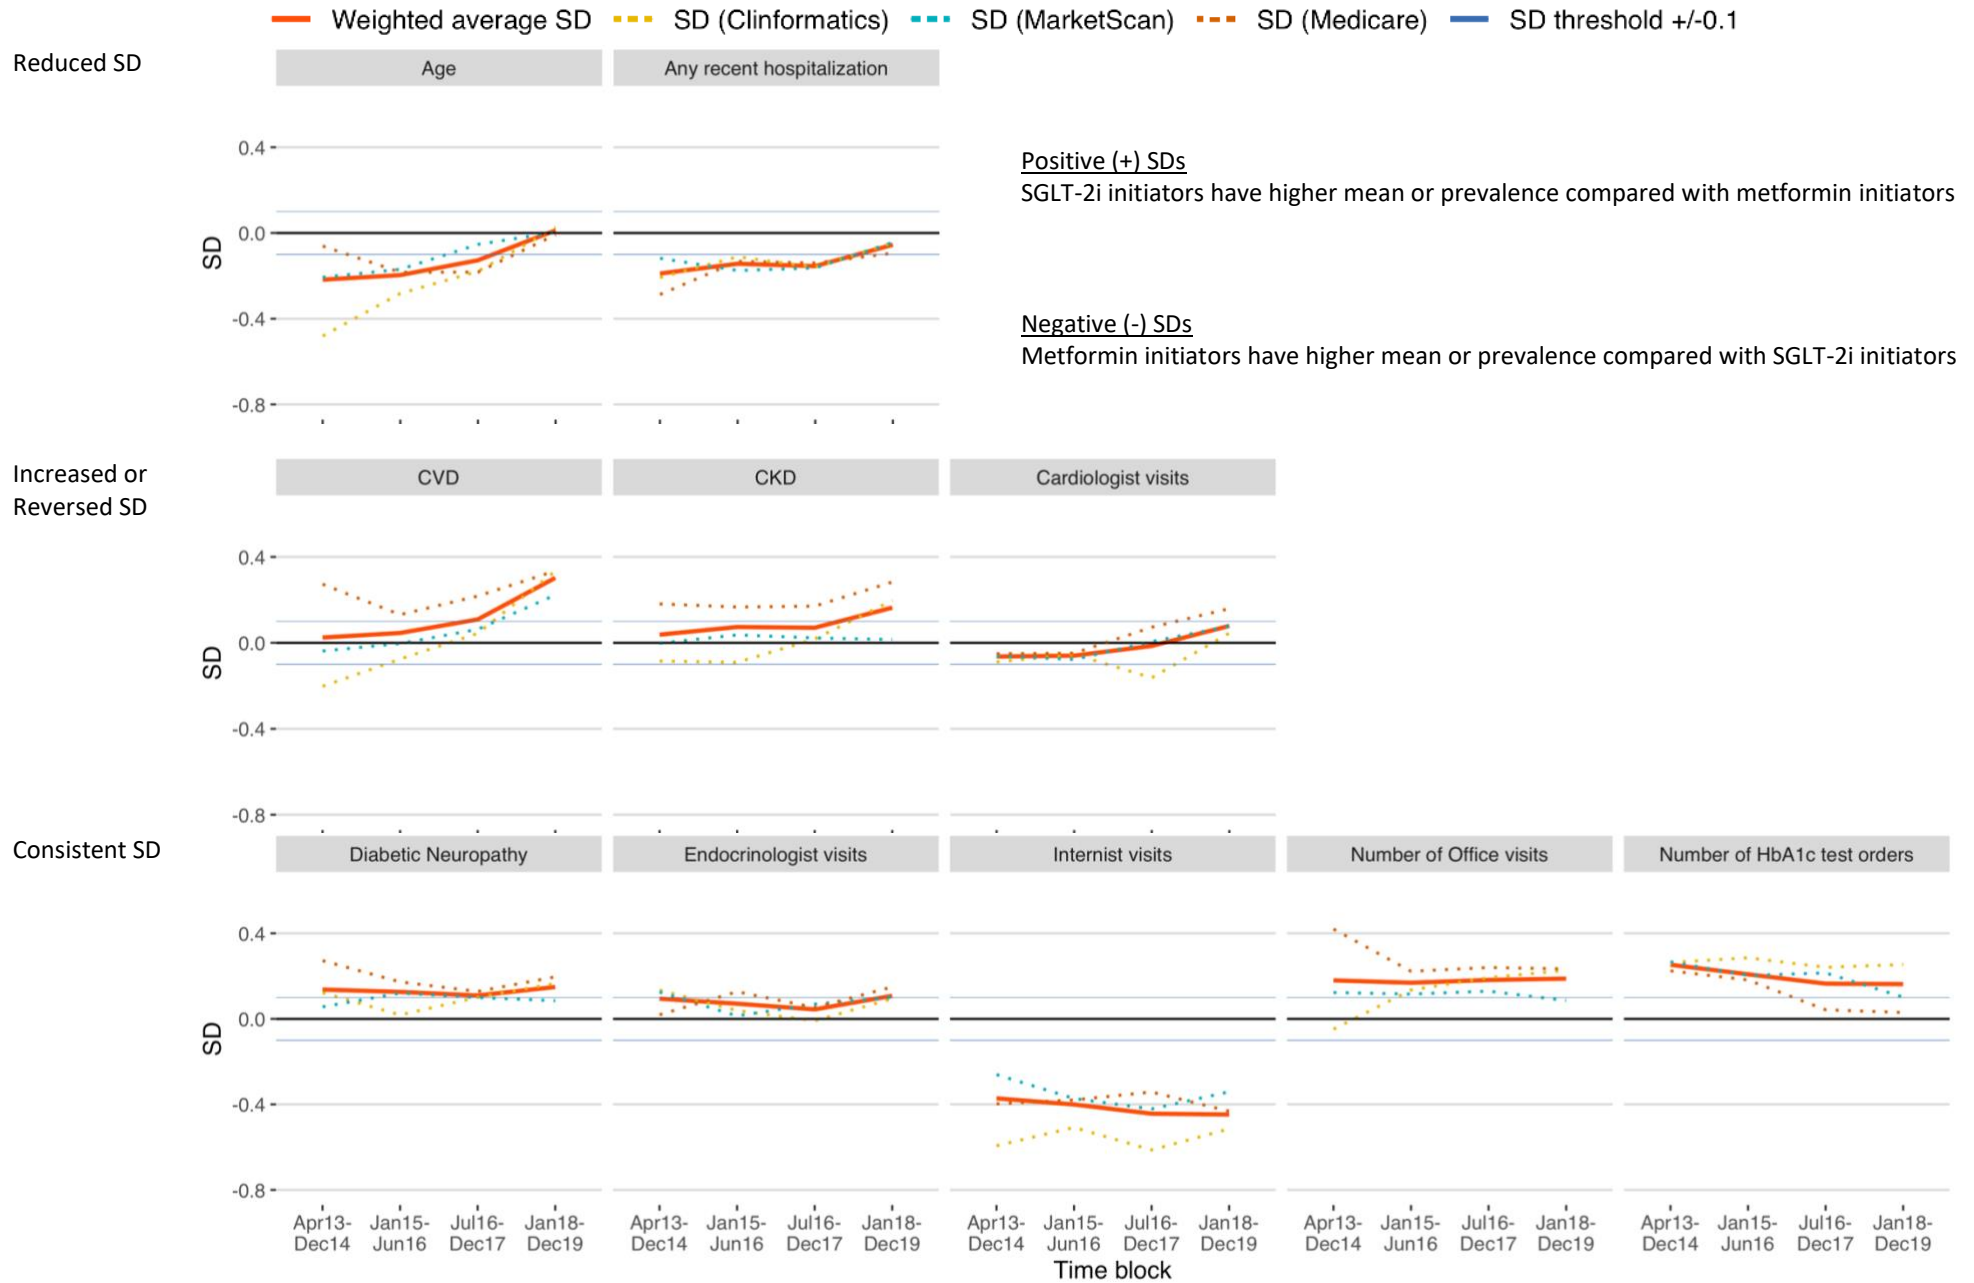

Supplement: NIHMS1785423-supplement-Supplement.pdf [file NIHMS1785423-supplement-Supplement.pdf]
